# Supplementary material for: Utility of Comprehensive GC×GC Gas Chromatography in Finding Varietal Markers among Volatile Compounds in Non-Aromatic Red Wines
Source: MDPI journal article supplement (doi:10.3390/agronomy12102512), 2022-10-14
Supplement: s1 [file s1]

# Utility of comprehensive GC×GC gas chromatography in finding varietal markers among volatile compounds in non-aromatic red wines

Igor Lukić <sup>1,2,\*</sup>, Silvia Carlin <sup>3</sup> and Urska Vrhovsek <sup>3</sup>

<sup>1</sup> Institute of Agriculture and Tourism, K. Huguesa 8, 52440 Poreč, Croatia

<sup>2</sup> Centre of Excellence for Biodiversity and Molecular Plant Breeding, Svetošimunska 25, 10000 Zagreb, Croatia

<sup>3</sup> Metabolomics Unit, Food and Nutrition Area, Research and Innovation Centre, Fondazione Edmund Mach (FEM), Via E. Mach 1, 38098 S. Michele all'Adige, TN, Italy

\* Correspondence: igor@iptpo.hr; Tel.: +385-52-408-327

## Supplementary Files

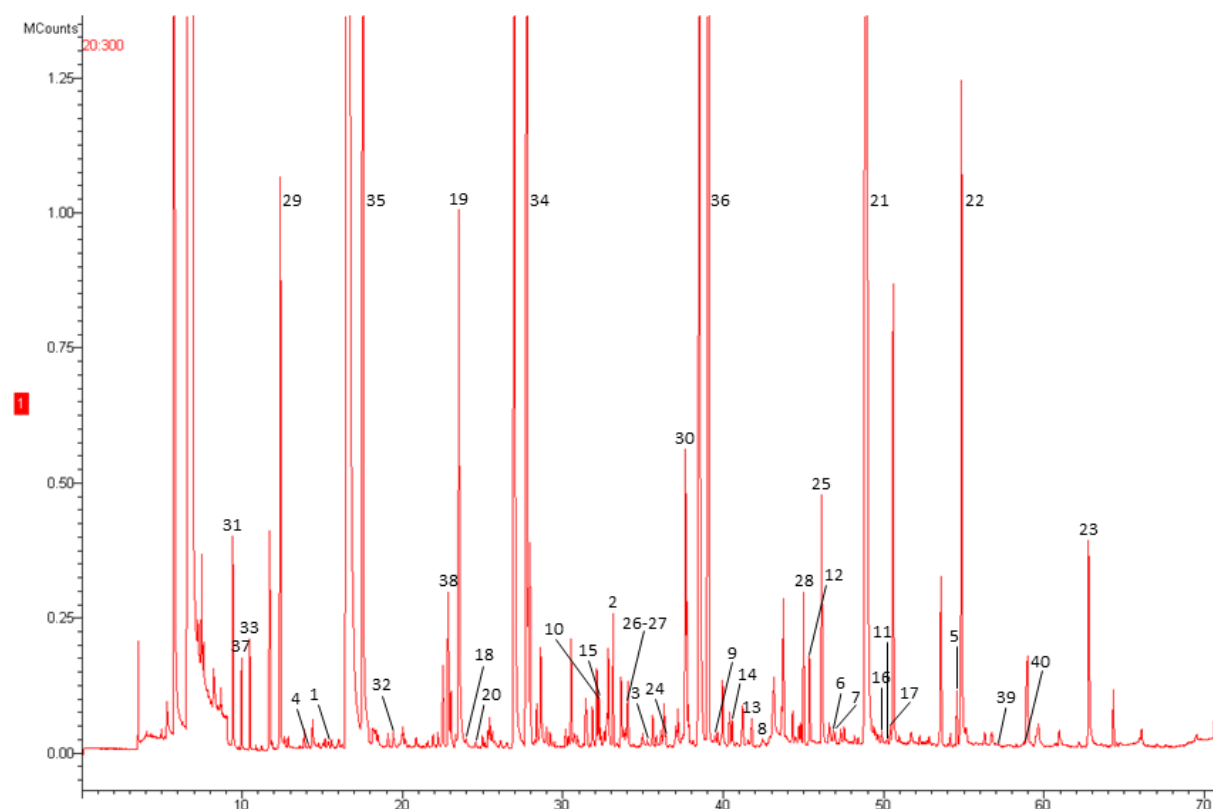

**Figure S1.** Example of a total ion current chromatogram obtained for a Teran monovarietal red wine using HS-SPME/GC-MS. The chromatographic peaks of the identified volatile compounds are numbered from 1 to 40 and correspond to those in Table 2.

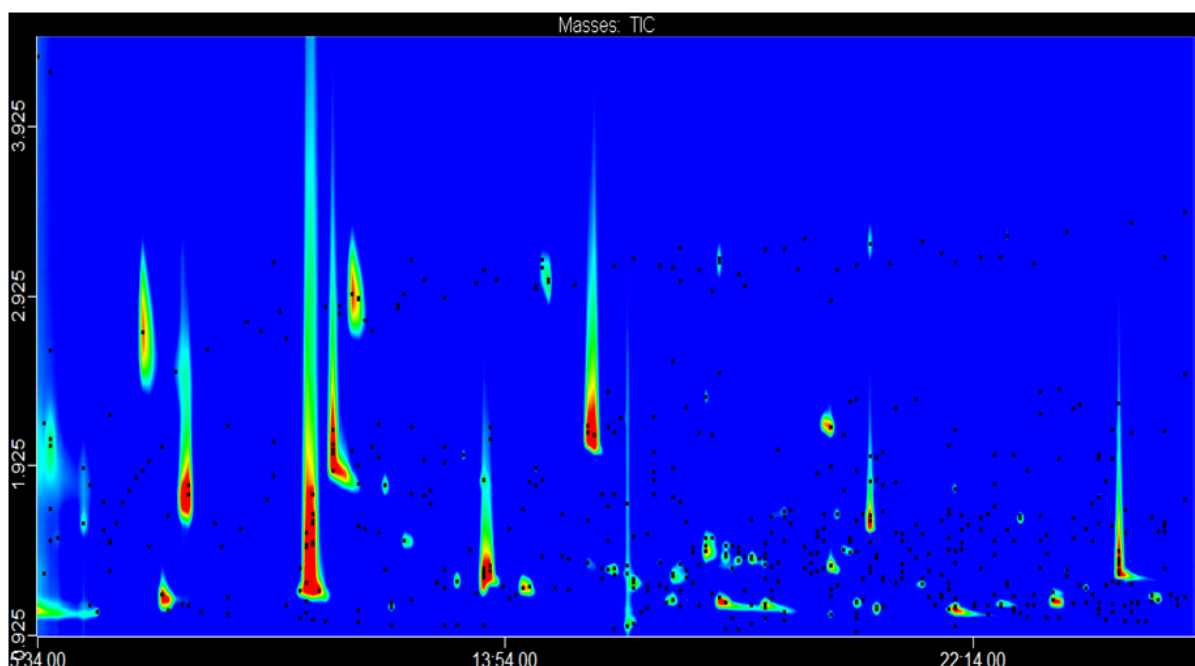

**Figure S2.** Example of a contour plot obtained for a monovarietal red wine using HS-SPME/GC×GC-TOF-MS. Colored areas represent more abundant volatile aroma compounds and black dots represent less abundant and trace volatile aroma compounds.

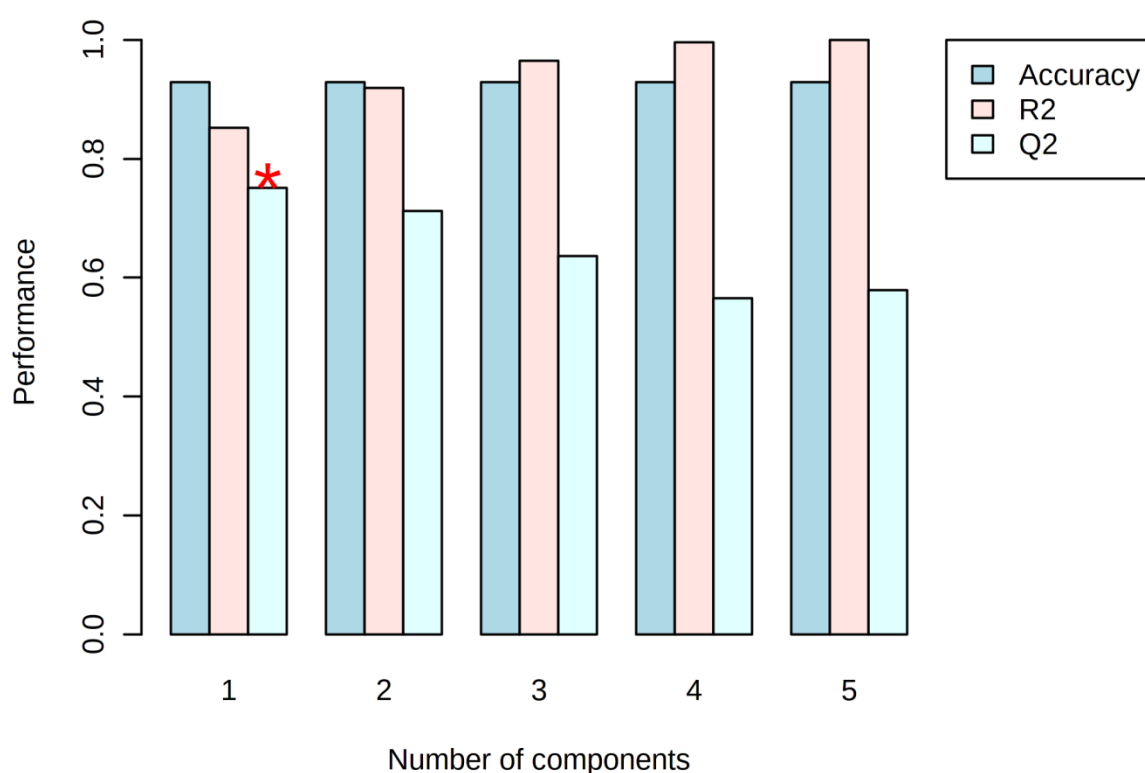

**Figure S3.** Evaluation of the PLS-DA model by a 10-fold cross-validation. Blue bars indicate the accuracy of the model, pink bars (R2) indicate the goodness of fit (explained variation), and light-blue bars (Q2) indicate the goodness of prediction. Good predictions with a high Q2 value are marked by \*.

**Table S1.** Climate parameters in the Istria and Dalmatia regions of Croatia in 2015.

| Parameter Region |          | Month (2015) |       |      |      |      |      |      |      |      |       |      |      |
|------------------|----------|--------------|-------|------|------|------|------|------|------|------|-------|------|------|
|                  |          | I            | II    | III  | IV   | V    | VI   | VII  | VIII | IX   | X     | XI   | XII  |
| Temp.<br>(°C)    | Istria   | 6.4          | 5.7   | 9.0  | 12.0 | 17.6 | 22.1 | 26.3 | 23.9 | 19.2 | 13.7  | 9.3  | 6.8  |
|                  | Dalmatia | 9.1          | 8.9   | 11.4 | 14.2 | 19.9 | 23.9 | 28.3 | 26.8 | 22.4 | 17.3  | 13.4 | 10.9 |
| Rainfall<br>(mm) | Istria   | 51.3         | 53.5  | 44.8 | 23.8 | 37.7 | 51.7 | 22.7 | 77.5 | 64.0 | 162.8 | 28.0 | 0.5  |
|                  | Dalmatia | 93.8         | 157.5 | 61.3 | 47.8 | 66.1 | 37.4 | 9.2  | 73.8 | 68.8 | 241.4 | 45.1 | 0.1  |

**Table S2.** Odor perception thresholds (OPT,  $\mu\text{g/L}$ ), odor descriptors, and average odor activity values (OAV = concentration/OPT) of the main odorants among volatile aroma compounds found in Plavac mali and Teran monovarietal red wines after headspace solid-phase microextraction followed by gas chromatography-mass spectrometry (HS-SPME-GC-MS), sorted by compound class and descending Fisher *F*-ratio (as reported in Table 2).

| No.                    | Volatile compounds     | OPT (matrix)‡            | Odor descriptors‡           | Variety           |                   |
|------------------------|------------------------|--------------------------|-----------------------------|-------------------|-------------------|
|                        |                        |                          |                             | PM                | TE                |
| Terpenes               |                        |                          |                             |                   |                   |
| 2                      | Linalool               | 15 (10% v/v ethanol)     | Roses, lychee               | 0.56              | 0.80              |
| 6                      | Geraniol               | 30 (10% v/v ethanol)     | Roses, geranium             | 0.41              | 0.61              |
| 8                      | Citronellol            | 18 (10% v/v ethanol)     | Citrus fruit                | 0.55              | 0.58              |
| 9                      | α-Terpineol            | 250 (synthetic wine*)    | Lilac, camphor              | 0.01              | 0.02              |
| C13-Norisoprenoids     |                        |                          |                             |                   |                   |
| 11                     | β-Ionone               | 0.09 (synthetic wine*)   | Violet                      | 1.33              | 1.78              |
| 12                     | β-Damascenone          | 0.05 (10% v/v ethanol)   | Sweet, fruity, stewed apple | 21.00             | 16.80             |
| Alcohols               |                        |                          |                             |                   |                   |
| 19                     | 1-Hexanol              | 8000 (10% v/v ethanol)   | Fresh cut grass             | 0.17              | 0.18              |
| 20                     | cis-3-Hexen-1-ol       | 400 (10% v/v ethanol)    | Green grass                 | 0.18              | 0.20              |
| 21                     | 2-Phenylethanol        | 10000 (10% v/v ethanol)  | Rose                        | 4.16              | 4.17              |
| Acids                  |                        |                          |                             |                   |                   |
| 22                     | Octanoic Acid          | 500 (synthetic wine*)    | Cheese, rancid, fat         | 2.71              | 2.17              |
| 23                     | Decanoic Acid          | 1000 (synthetic wine*)   | Rancid, waxen, plasticine   | 0.20              | 0.14              |
| 24                     | Butyric acid           | 173 (synthetic wine*)    | Aged cheese, rancid         | 5.40              | 6.23              |
| 25                     | Hexanoic acid          | 420 (synthetic wine*)    | Cheese, rancid              | 3.78              | 3.80              |
| Esters                 |                        |                          |                             |                   |                   |
| 28                     | 2-Phenethyl acetate    | 250 (10% v/v ethanol)    | Fruity, honey, floral       | 5.48              | 3.65              |
| 29                     | Isoamyl acetate        | 30 (10% v/v ethanol)     | Banana                      | 29.30             | 21.97             |
| 30                     | Ethyl decanoate        | 200 (synthetic wine*)    | Grapes, fruity              | 0.28              | 0.20              |
| 31                     | Ethyl butyrate         | 20 (10% v/v ethanol)     | Fruity                      | 11.80             | 9.86              |
| 33                     | Ethyl-3-methylbutyrate | 3 (10% v/v ethanol)      | Berry, blackberry           | 5.76              | 7.86              |
| 34                     | Ethyl octanoate        | 2 (10% v/v ethanol)      | Fruity                      | 76.85             | 48.25             |
| 35                     | Ethyl hexanoate        | 5 (10% ethanol)          | Green apple                 | 56.80             | 33.02             |
| 36                     | Diethyl succinate      | 6000 (10% ethanol)       | Overripe melon, vinous      | 0.56              | 0.68              |
| 37                     | Ethyl 2-methylbutyrate | 1 (10% v/v ethanol)      | Sweet fruit                 | 11.15             | 15.83             |
| 38                     | Ethyl lactate          | 100000 (14% v/v ethanol) | Buttery                     | 0.78              | 0.72              |
| Benzenoids and phenols |                        |                          |                             |                   |                   |
| 39                     | Ethyl cinnamate        | 1 (10% v/v ethanol)      | Honey, cinnamon             | 0.36 <sup>a</sup> | 0.14 <sup>b</sup> |
| 40                     | Eugenol                | 5 (10% v/v ethanol)      | Cloves                      | 0.16              | 0.22              |

\*Synthetic wine: 11% v/v ethanol, 7 g/L glycerol, 5 g/L tartaric acid, pH 3.4

<sup>‡</sup>Odor perception thresholds ( $\mu\text{g/L}$ ) and odor descriptors reported in the literature [11,34,35,38,42-44].
